# Supplementary material for: A central role of IKK2 and TPL2 in JNK activation and viral B-cell transformation
Source: PubMed Central journal article supplement (PMC7000802; doi:10.1038/s41467-020-14502-x), 2020-02-04
Supplement: 41467_2020_14502_MOESM1_ESM.pdf [file 41467_2020_14502_MOESM1_ESM.pdf]

**A central role of IKK2 and TPL2 in  
JNK activation and viral B-cell transformation**

Stefanie Voigt, Kai R. Sterz, Fabian Giehler, Anne-Wiebe Mohr,  
Joanna B. Wilson, Andreas Moosmann, Arnd Kieser

**Supplementary Figures, Tables and References**

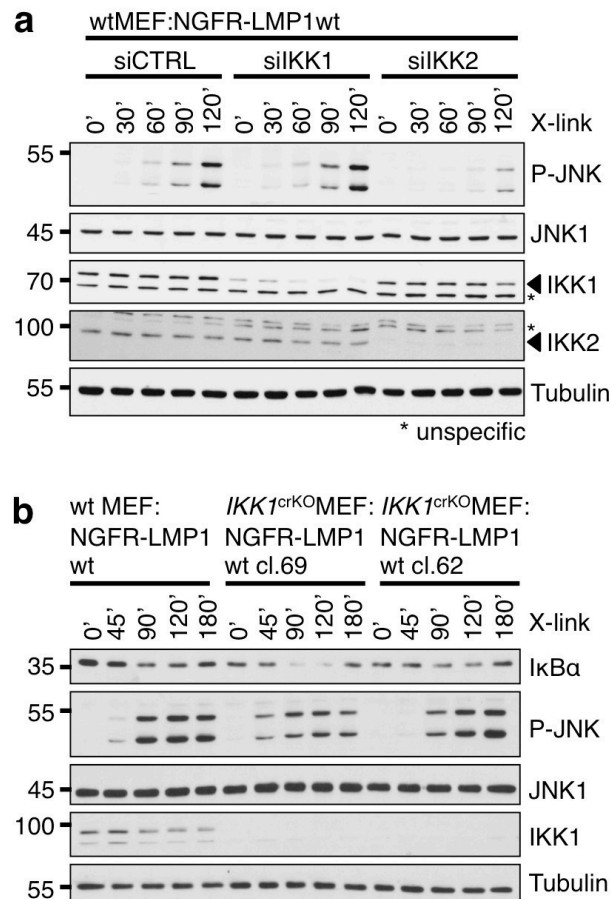

### Supplementary Figure 1

**Supporting evidence for the differential requirement of IKK1 and IKK2 in JNK activation by LMP1.** **a** The siRNA-mediated knockdown of IKK2, but not of IKK1, blocks JNK1 activation by LMP1. Wildtype MEF:NGFR-LMP1wt cells were transfected twice with siRNA targeting IKK1 (siIKK1), IKK2 (siIKK2), or non-targeting control siRNA (siCTRL) in six-well-plates. One day after the last transfection, NGFR-LMP1 was activated by antibody crosslinking and JNK activation was monitored. The knockdown of IKK1 or IKK2 was confirmed by immunoblotting using the indicated antibodies. **b** No defects in JNK activation by LMP1 in an additional CRISPR/Cas9 IKK1 knockout clone. *IKK1*<sup>crKO</sup>MEF:NGFR-LMP1wt clones 62 and 69 were induced by antibody crosslinking and analysed by immunoblotting as indicated. The knockout of IKK1 was verified at the protein level by the IKK1 antibody and by sequencing (see Supplementary Table 2).

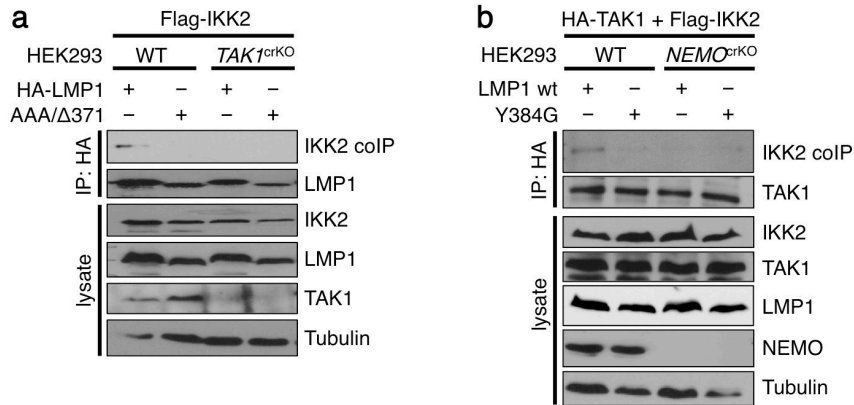

### Supplementary Figure 2

**TAK1 and NEMO mediate signaling complex formation and IKK2 recruitment at LMP1-CTAR2** **a** The knockout of TAK1 prevents LMP1 interaction with IKK2. The experiment was performed as described in Figure 3f, except that co-immunoprecipitation of LMP1 and IKK2 was performed vice versa. HA-LMP1 was immunoprecipitated via the HA (3F10) antibody and co-precipitating Flag-IKK2 was detected by the IKK2 antibody. **b** NEMO is required for the CTAR2-induced interaction of TAK1 with IKK2. NEMO was targeted by CRISPR/Cas9 in HEK293 cells. HEK293 wildtype and *NEMO<sup>crKO</sup>* (clone 28) cells were transfected with Flag-IKK2 and HA-TAK1 together with pSV-LMP1 wildtype or pSV-LMP1(Y384G). HA-TAK1 was immunoprecipitated via the HA (3F10) antibody and interacting Flag-IKK2 was detected by the H-470 antibody.

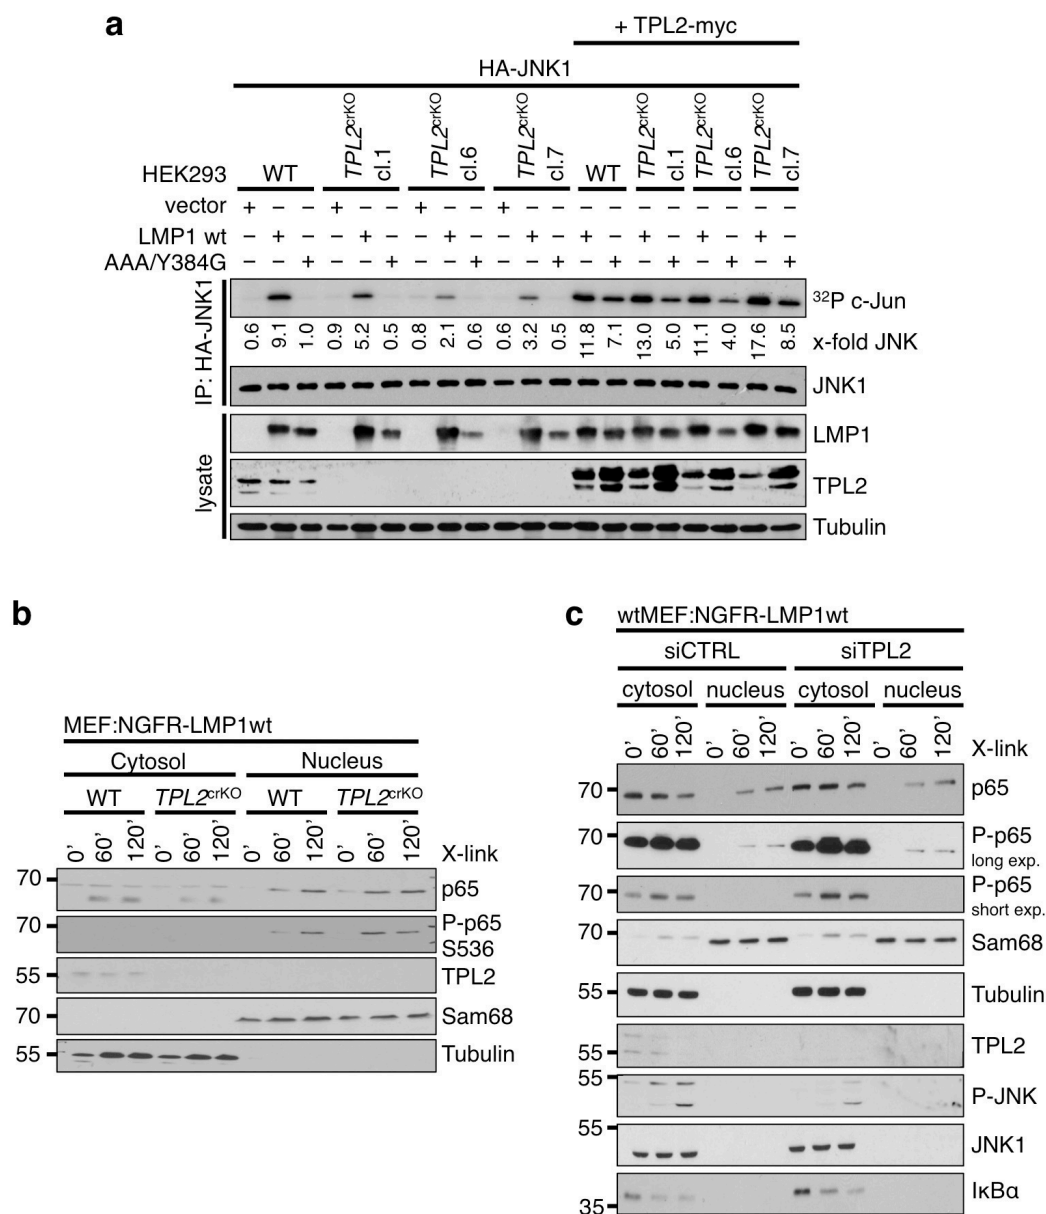

**Supplementary Figure 3**

**Supportive data for the differential role of TPL2 in JNK and NF-κB activation by LMP1.** **a** The knockout of TPL2 in HEK293 cells interferes with LMP1's ability to induce the JNK pathway and exogenous TPL2 expression rescues JNK activation. The *TPL2* gene was targeted in HEK293 cells by CRISPR/Cas9. Wildtype HEK293 cells and the TPL2 knockout clones 1, 6 and 7 were transfected with HA-JNK1 together with LMP1 wildtype, the inactive AAA/Y384G mutant, or empty vector. Where indicated, TPL2-myc was co-transfected. HA-JNK1 was immunoprecipitated and its activity was monitored in *in vitro* kinase assays using GST-c-Jun as substrate. Quantification of JNK activity is given as x-fold induction versus wildtype cells transfected with AAA/Y384G, normalised to the amounts of immunoprecipitated HA-JNK. Ectopic expression of kinase-active TPL2-myc itself caused a certain activation of JNK. However, TPL2-myc facilitated high levels of JNK activation by LMP1 in TPL2-deficient cells. *TPL2* gene targeting was verified by

immunoblotting and sequencing (see Supplementary Table 2). **b** The knockout of TPL2 has no negative effect on LMP1-induced p65 NF- $\kappa$ B translocation into the nucleus or p65 NF- $\kappa$ B phosphorylation at serine 536. NGFR-LMP1 was induced in wildtype and *TPL2*<sup>crKO</sup> (clone 8) cells for the indicated times. Cytoplasmic and nuclear fractions were prepared and analysed by immunoblotting. **c** The knockdown of TPL2 does not affect LMP1-induced p65 NF- $\kappa$ B phosphorylation at serine 536 or its translocation into the nucleus. Wildtype MEF:NGFR-LMP1wt cells were transfected twice with siRNA targeting murine TPL2 (siTPL2) or non-targeting siRNA (siCTRL). NGFR-LMP1 was induced by antibody crosslinking for the indicated times. Cytoplasmic and nuclear fractions were prepared and further analysed by immunoblotting.

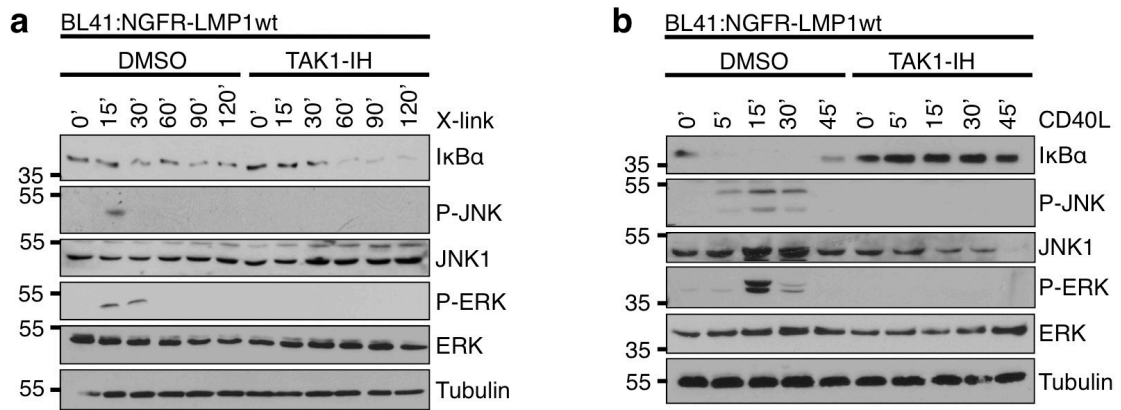

**Supplementary Figure 4**

**LMP1 and CD40 signaling in B-cells differ with regard to the functions of TAK1. a, b** BL41:NGFR-LMP1wt cells were treated with solvent (DMSO) or 500 nM (5Z)-7-oxozeaenol (TAK1-IH). In (a) NGFR-LMP1 activity was induced by antibody crosslinking (X-link), in (b) CD40 was activated with 600 ng/ml soluble CD40 ligand (CD40L) for the indicated times. JNK, ERK and NF- $\kappa$ B activation was detected in total cell lysates using the indicated antibodies.

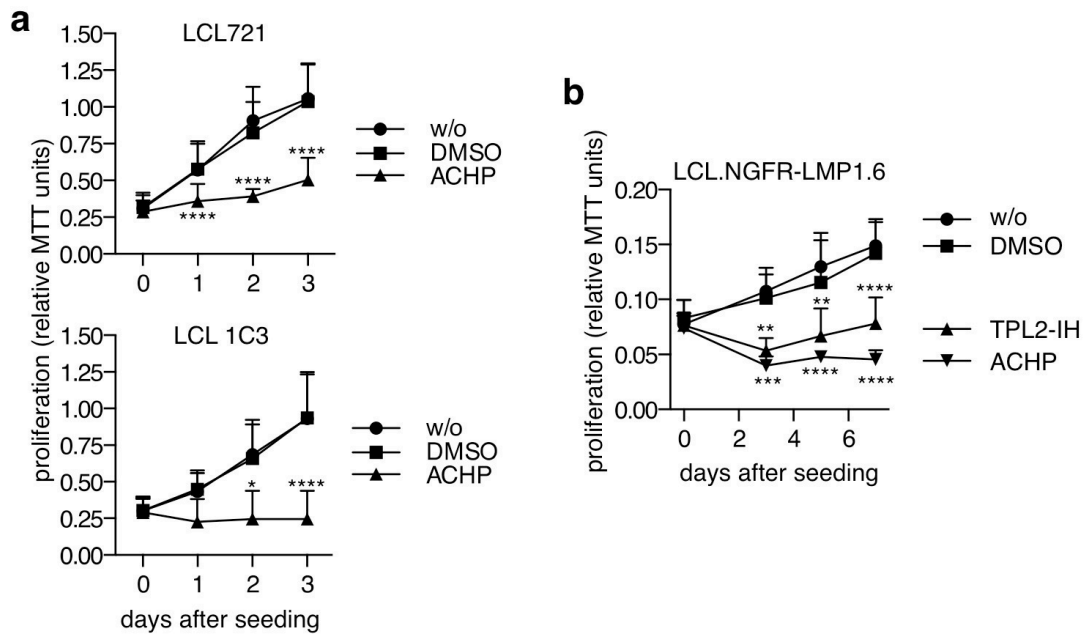

### Supplementary Figure 5

**Effects of pharmacological IKK and TPL2 inhibition on lymphoblastoid cells. a** IKK inhibition interferes with proliferation of LCLs. LCL721 and LCL 1C3 lymphoblastoid cell lines were either kept in culture without further treatment, in the presence of solvent (DMSO) or 10  $\mu$ M ACHP. Cell proliferation was measured at the indicated times as MTT conversion. Data are mean values  $\pm$ SD of 5 biological replicates. **b** IKK and TPL2 inhibition blocks proliferation of LCLs driven by NGFR-LMP1. LCL.NGFR-LMP1.6 cells were kept under permanent antibody crosslink to activate NGFR-LMP1 signaling (w/o). As indicated, the cells were additionally incubated with DMSO, 10  $\mu$ M ACHP, or 10  $\mu$ M TC-S7006 (TPL2-IH). MTT assays were performed to monitor proliferation. Data are mean values  $\pm$ SD of 5 biological replicates. **a, b** Statistical analysis was performed with two-way ANOVA at alpha 0.05, p-values: \* $p \leq 0.05$ , \*\* $p \leq 0.01$ , \*\*\* $p \leq 0.001$ , \*\*\*\* $p \leq 0.0001$ .

```

                                PxQxT  212
PTLD880      187 HGQRHSDEHHHDDSLPHPPQQATDDSAHESDSNSNEGRHLLVSGAGDGPPLCSQNLGAPG 246
PTLD099      187 HGQRHSDEHHHDDSLPHPPQQATHNSHESDSNSNEGRHLLVSGAGDGPPLCSQNLGSPG 246
LMP1 B95.8   187 HGQRHSDEHHHDDSLPHPPQQATDDSGHESDSNSNEGRHLLVSGAGDGPPLCSQNLGAPG 246
                *****
                * *****

PTLD880      247 GGPDNGPQDPDNTDDNGPQDPDNTDDNGPHDPLPQDPDNTDDNGPQDPLPQDPDNTDDNG 306
PTLD099      247 GGPDNGPQDPDNTDDNGPQDPDNTDDNGPHDPL----- 279
LMP1 B95.8   247 GGPDNGPQDPDNTDDNGPQDPDNTDDNGPHDPL----- 279
                *****

PTLD880      307 PQDPLPQDPDNTDDNGPHDPLPQDPDNTDDNGPQDPDNTDDNGPHDPLPHSPDSAGNDG 366
PTLD099      280 -----PQDPDNTDDNGPQDPDNTDDNGPHDPLPHSPDSAGNDG 318
LMP1 B95.8   280 -----PQDPDNTDDNGPQDPDNTDDNGPHDPLPHSPDSAGNDG 318
                *****

                328                                366
PTLD880      367 GPPQLTEEVQNKGGDQGPPLMTDGGGGHSHDSGHRGGDPHLPTLLLGTSGSGGDDDDPHG 426
PTLD099      319 GPPQLTEEVQNKGGDQGPPLMTDGGGGHSHDSGHGGDPHLPTLLLGTSGSGGDDDDPHG 378
LMP1 B95.8   319 GPPQLTEEVQNKGGDQGPPLMTDGGGGHSHDSGHGGDPHLPTLLLGSSGSGGDDDDPHG 378
                *****

PTLD880      427 PVQLSYYD* 434
PTLD099      379 PVQLSYYD* 386
LMP1 B95.8   379 PVQLSYYD* 386
                *****

```

### Supplementary Figure 6

**Signaling domains of LMP1 proteins expressed in PTLD099 and PTLD880 cells established from post-transplantation lymphoproliferative disease tumour biopsies.** EBV-positive B-cells were isolated from two independent PTLD tumour biopsies derived from two PTLD patients. Genomic DNA was isolated from PTLD099 and PTLD880 cells, the *LMP1* genes were amplified by PCR and the LMP1 signaling domains of both samples were sequenced. Primer sequences are given in Supplementary Table 1. Both tumour-derived LMP1 versions carry mutations as compared to proto-type B95.8 LMP1, which have previously been observed in *LMP1* genes of field isolates <sup>1-3</sup>. Most strikingly, PTLD880 LMP1 carries an insertion of 33 bp repeats after Leu 279 comprising 48 amino acids. The mutational hotspots Gly 212 (destruction box), Glu 328 (JAK3 box 2) and Ser 366 are altered in both tumour-derived LMP1 proteins. Interestingly, PTLD099 carries an unusual mutation of two amino acids proximal to the TRAF interaction site PxQxT of CTAR1. Aspartates 209 and 210 are replaced in PTLD099 LMP1 by histidine and asparagine. Numbering of LMP1 residues refers to amino acid positions in B95.8 LMP1. The PxQxT motif is framed. Mutations in PTLD LMP1 proteins versus B95.8 LMP1 are highlighted in red.



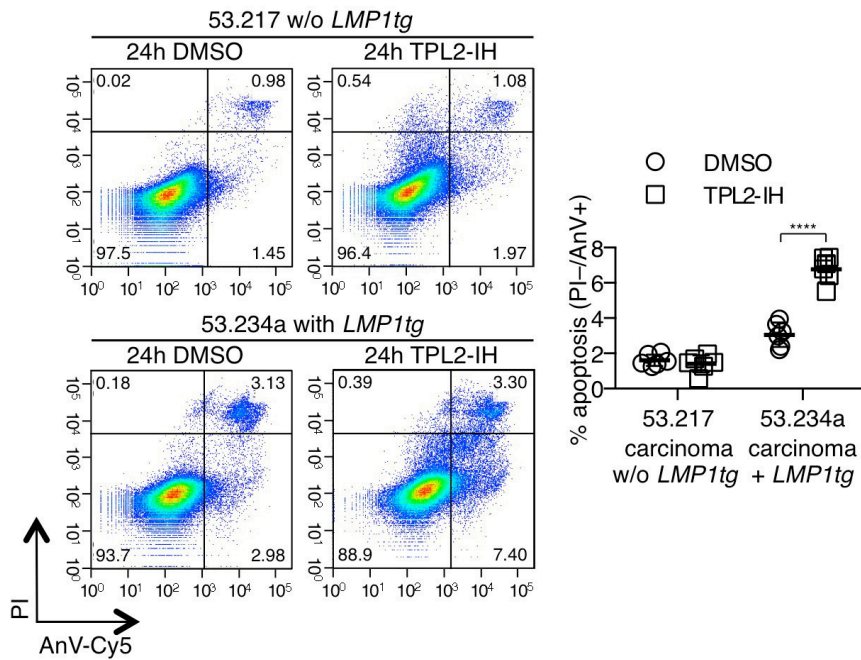

### Supplementary Figure 7

**LMP1-dependent carcinoma cells derived from LMP1-transgenic mice show a significant increase in apoptosis after TPL2 inhibition.** The LMP1-negative murine carcinoma line 53.217 and the corresponding LMP1-dependent carcinoma line 53.234a, which was established from *LMP1*-transgenic (*LMP1tg*) mice, were treated with 10  $\mu$ M TC-S7006 (TPL2-IH) or DMSO for 24 h. Cells were stained with propidium iodide (PI) and Annexin V-Cy5, and further analysed by flow cytometry. PI-/AnV-Cy5+ cell numbers indicate apoptosis rates. Combined apoptosis rates of six independent experiments are given as mean values  $\pm$  SD. Statistical analysis was performed with two-way ANOVA at alpha 0.05, p-value: \*\*\*\* $p \leq 0.0001$ .

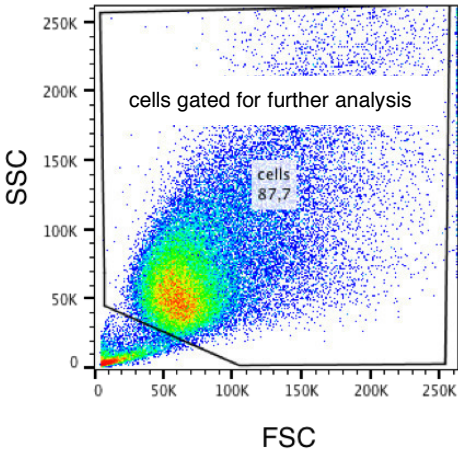

**Supplementary Figure 8**

**Gating strategy.** Lymphocytes and carcinoma cells within the indicated gate were further analysed for PI and AnV-Cy5 staining. By this gating strategy all cells were included into the analysis whereas cell debris was excluded.

**Supplementary Table 1**  
**PCR and sequencing primers used in this study.**

| Name  | Sequence                | Application                              |
|-------|-------------------------|------------------------------------------|
| AK549 | CACCACTATGCCTGGCTTGA    | murine <i>NEMO</i> ex3 forward primer    |
| AK550 | TCTGGATGGTTCTTGGGCAC    | murine <i>NEMO</i> ex3 reverse primer    |
| AK551 | TGCTGTGAATGGAAGTCTAG    | murine <i>NEMO</i> ex3 sequencing primer |
| AK552 | AGGCCCTTTGGTCTCCAATG    | murine <i>TPL2</i> ex2 forward primer    |
| AK553 | TGGCAGCCATTCTTAAGCCA    | murine <i>TPL2</i> ex2 reverse primer    |
| AK554 | CAAACACATTATAGTGAAGG    | murine <i>TPL2</i> ex2 sequencing primer |
| SV008 | ATAGGAACCGCACGCACGAT    | murine <i>IKK1</i> ex1 forward primer    |
| SV009 | TCTAGTCCAGTCTCCAGTGG    | murine <i>IKK1</i> ex1 reverse primer    |
| SV010 | GACTCTGCATGCGGAAGCTA    | murine <i>IKK1</i> ex1 sequencing primer |
| AK555 | TCCCATGGGTCTTGAATGCA    | human <i>TPL2</i> ex2 forward primer     |
| AK556 | CATGTTGGCCAGACTGGTCT    | human <i>TPL2</i> ex2 reverse primer     |
| AK557 | TGCAAGTGAAGAGCCAGCAG    | human <i>TPL2</i> ex2 sequencing primer  |
| AK558 | AGCACCTCCCTTTGGAATGG    | human <i>NEMO</i> ex2 forward primer     |
| AK559 | ACAGAGGCCTGGACATGTTG    | human <i>NEMO</i> ex2 reverse primer     |
| AK560 | GCATCCTGATACACTAGGTG    | human <i>NEMO</i> ex2 sequencing primer  |
| AK575 | TGCTTCTTAGCTTACTCCAC    | human <i>TAK1</i> ex1 forward primer     |
| AK576 | CACAGCCCTCAGTAACGTGG    | human <i>TAK1</i> ex1 reverse primer     |
| AK577 | AAAACGCAGCGGAGCCAGAG    | human <i>TAK1</i> ex1 sequencing primer  |
| AK605 | CAACTGCCTTGCTCCTGACACAC | <i>LMP1</i> forward primer               |
| AK606 | GGGAGTGTGTGCCAGTTAAGGTG | <i>LMP1</i> reverse primer               |
| AK607 | GTGATTAGCTAAGGCATTCC    | <i>LMP1</i> sequencing primer            |

**Supplementary Table 2**  
**Sequencing results of CRISPR/Cas9-mediated gene knockout cell clones.**

| Cell line <sup>a</sup> and gene                                    | Accession number | Sigma-Aldrich gRNA ID | Ex <sup>b</sup> | Mutations at gRNA targeting site        |
|--------------------------------------------------------------------|------------------|-----------------------|-----------------|-----------------------------------------|
| MEF<br><i>IKK1</i> <sup>crKO</sup> cl. 62                          | NM_007700.2      | MM0000145296          | 1               | Indel, frameshift                       |
| MEF<br><i>IKK1</i> <sup>crKO</sup> cl. 69                          | NM_007700.2      | MM0000145296          | 1               | Indel, frameshift                       |
| MEF <i>IKK2</i> <sup>-/-</sup><br><i>IKK1</i> <sup>crKO</sup> cl.8 | NM_007700.2      | MM0000145296          | 1               | Indel, frameshift                       |
| MEF<br><i>NEMO</i> <sup>crKO</sup> cl.2                            | NC_000086.7      | MM0000125118          | 3               | Indel, frameshift                       |
| MEF<br><i>NEMO</i> <sup>crKO</sup> cl.7                            | NC_000086.7      | MM0000125118          | 3               | Indel, frameshift                       |
| MEF<br><i>NEMO</i> <sup>crKO</sup> cl.19                           | NC_000086.7      | MM0000125118          | 3               | Indel, frameshift                       |
| MEF<br><i>TPL2</i> <sup>crKO</sup> cl.8                            | NC_000084.6      | MM0000226028          | 2               | Indel, frameshift                       |
| HEK293<br><i>Tpl2</i> <sup>crKO</sup> cl.1                         | NC_000010.11     | HS0000206639          | 2               | Indel, frameshift                       |
| HEK293<br><i>TPL2</i> <sup>crKO</sup> cl.6                         | NC_000010.11     | HS0000206639          | 2               | Indel, frameshift                       |
| HEK293<br><i>TPL2</i> <sup>crKO</sup> cl.7                         | NC_000010.11     | HS0000206639          | 2               | Indel, frameshift                       |
| HEK293<br><i>TAK1</i> <sup>crKO</sup> cl.3                         | NG_011966.2      | HS00000272768         | 1               | Indel, frameshift                       |
| HEK293<br><i>NEMO</i> <sup>crKO</sup> cl.28                        | NG_009896.1      | HS0000099337          | 2               | Indel, translational start site deleted |

<sup>a</sup> All mouse embryonic fibroblast lines express NGFR-LMP1

<sup>b</sup> Exon targeted by gRNA

**Supplementary Table 3. Quantification and statistics of immunoblots (Figures 1 to 6)**

n, number of biological replicates  
SD, standard deviation

| Figure                        | Antibody         | Sample      | X-link                        | Mean (n=3) | ±SD                          | p-value (Y <sub>384</sub> G vs. corresponding wt) |            |      |
|-------------------------------|------------------|-------------|-------------------------------|------------|------------------------------|---------------------------------------------------|------------|------|
| <b>Figure 1c</b>              | P-JNK            | NGFR-LMP1wt | 0 min                         | 0.03       | 0.02                         |                                                   |            |      |
|                               |                  |             | 20 min                        | 0.05       | 0.05                         |                                                   |            |      |
|                               |                  |             | 30 min                        | 0.06       | 0.07                         |                                                   |            |      |
|                               |                  |             | 45 min                        | 0.26       | 0.15                         |                                                   |            |      |
|                               |                  |             | 60 min                        | 0.54       | 0.20                         |                                                   |            |      |
|                               |                  |             | 90 min                        | 0.89       | 0.14                         |                                                   |            |      |
|                               |                  |             | §120 min                      | 1.00       | 0.00                         |                                                   |            |      |
|                               |                  |             | 180 min                       | 0.91       | 0.03                         |                                                   |            |      |
|                               |                  |             | 360 min                       | 0.84       | 0.31                         |                                                   |            |      |
|                               |                  |             | 600 min                       | 0.42       | 0.14                         |                                                   |            |      |
|                               |                  |             | NGFR-LMP1(Y <sub>384</sub> G) | 0 min      | 0.03                         | 0.04                                              |            |      |
|                               |                  |             |                               | 20 min     | 0.04                         | 0.04                                              | p = 0.80   |      |
|                               |                  | 30 min      |                               | 0.03       | 0.04                         | p = 0.58                                          |            |      |
|                               |                  | 45 min      |                               | 0.04       | 0.04                         | p = 0.067                                         |            |      |
|                               |                  | 60 min      |                               | 0.04       | 0.05                         | *p = 0.014                                        |            |      |
|                               |                  | 90 min      |                               | 0.04       | 0.05                         | ***p = 0.00059                                    |            |      |
|                               |                  | 120 min     |                               | 0.06       | 0.07                         | ****p = 0.000019                                  |            |      |
|                               |                  | 180 min     |                               | 0.05       | 0.06                         | ****p = 0.000018                                  |            |      |
|                               |                  | 360 min     |                               | 0.12       | 0.11                         | *p = 0.018                                        |            |      |
|                               |                  | 600 min     |                               | 0.04       | 0.04                         | *p = 0.011                                        |            |      |
|                               |                  | §set to 1   |                               |            | T-test, unpaired, two-tailed |                                                   |            |      |
|                               |                  |             |                               | IκBα       | NGFR-LMP1wt                  | §0 min                                            | 1.00       | 0.00 |
|                               |                  |             | 20 min                        |            |                              | 0.75                                              | 0.12       |      |
|                               |                  |             | 30 min                        |            |                              | 0.63                                              | 0.18       |      |
| 45 min                        | 0.39             |             | 0.29                          |            |                              |                                                   |            |      |
| 60 min                        | 0.28             |             | 0.14                          |            |                              |                                                   |            |      |
| 90 min                        | 0.28             |             | 0.19                          |            |                              |                                                   |            |      |
| 120 min                       | 0.31             |             | 0.17                          |            |                              |                                                   |            |      |
| 180 min                       | 0.31             |             | 0.16                          |            |                              |                                                   |            |      |
| 360 min                       | 0.29             |             | 0.26                          |            |                              |                                                   |            |      |
| 600 min                       | 0.48             |             | 0.17                          |            |                              |                                                   |            |      |
| NGFR-LMP1(Y <sub>384</sub> G) | §0 min           |             | 1.00                          |            |                              | 0.00                                              |            |      |
|                               | 20 min           |             | 1.21                          |            |                              | 0.13                                              | **p = 0.01 |      |
|                               | 30 min           |             | 1.13                          |            | 0.08                         | *p = 0.011                                        |            |      |
|                               | 45 min           |             | 1.10                          |            | 0.09                         | *p = 0.016                                        |            |      |
|                               | 60 min           |             | 0.94                          |            | 0.15                         | **p = 0.0049                                      |            |      |
|                               | 90 min           |             | 0.83                          |            | 0.20                         | *p = 0.026                                        |            |      |
|                               | 120 min          |             | 1.11                          |            | 0.38                         | *p = 0.029                                        |            |      |
|                               | 180 min          |             | 1.14                          |            | 0.38                         | *p = 0.025                                        |            |      |
|                               | 360 min          |             | 1.07                          |            | 0.43                         | p = 0.054                                         |            |      |
|                               | 600 min          |             | 0.87                          |            | 0.46                         | p = 0.24                                          |            |      |
|                               | §set to 1        |             |                               |            | T-test, unpaired, two-tailed |                                                   |            |      |
|                               | <b>Figure 1d</b> |             | TRAF3                         |            | NGFR-LMP1wt                  | §0 min                                            | 1.00       | 0.00 |
| 60 min                        |                  |             |                               |            |                              | 0.40                                              | 0.07       |      |
| 120 min                       |                  |             |                               |            |                              | 0.43                                              | 0.00       |      |
| §0 min                        |                  | 1.00        |                               | 0.00       |                              |                                                   |            |      |
| NGFR-LMP1(Y <sub>384</sub> G) |                  | 60 min      |                               | 0.37       | 0.20                         | p = 0.82                                          |            |      |
|                               |                  | 120 min     |                               | 0.40       | 0.29                         | p = 0.86                                          |            |      |
|                               |                  | §set to 1   |                               |            | T-test, unpaired, two-tailed |                                                   |            |      |

| Figure 1e | Antibody | Sample          | X-link    | Mean (n=6) | ±SD  | p-value ( <i>IKK2</i> -/- vs. corresponding WT) |
|-----------|----------|-----------------|-----------|------------|------|-------------------------------------------------|
|           | IκBα     | WT              | §0 min    | 1.00       | 0.00 |                                                 |
|           |          |                 | 30 min    | 0.87       | 0.15 |                                                 |
|           |          |                 | 60 min    | 0.46       | 0.23 |                                                 |
|           |          |                 | 90 min    | 0.40       | 0.26 |                                                 |
|           |          |                 | 120 min   | 0.46       | 0.26 |                                                 |
|           |          |                 | 180 min   | 0.49       | 0.15 |                                                 |
|           |          | <i>IKK2</i> -/- | §0 min    | 1.00       | 0.00 |                                                 |
|           |          |                 | 30 min    | 0.94       | 0.13 | p = 0.43                                        |
|           |          |                 | 60 min    | 1.09       | 0.49 | *p = 0.016                                      |
|           |          |                 | 90 min    | 0.97       | 0.32 | **p = 0.008                                     |
|           |          |                 | 120 min   | 1.05       | 0.41 | *p = 0.015                                      |
|           |          |                 | 180 min   | 1.11       | 0.79 | p = 0.085                                       |
|           |          |                 | §set to 1 |            |      | T-test, unpaired, two-tailed                    |

| Figure 1f | Antibody | Sample                     | X-link                        | Mean (n=2) | ±SD  | p-value ( <i>IKK2</i> -/- nucleus vs. corresponding WT nucleus) |
|-----------|----------|----------------------------|-------------------------------|------------|------|-----------------------------------------------------------------|
|           | p65      | WT, cytoplasm              | §0 h                          | 1.00       | 0.00 |                                                                 |
|           |          |                            | 1 h                           | 0.55       | 0.26 |                                                                 |
|           |          |                            | 2 h                           | 0.50       | 0.24 |                                                                 |
|           |          | <i>IKK2</i> -/-, cytoplasm | #0 h                          | 1.00       | 0.00 |                                                                 |
|           |          |                            | 1 h                           | 0.87       | 0.01 |                                                                 |
|           |          |                            | 2 h                           | 0.84       | 0.18 |                                                                 |
|           |          | WT, nucleus                | 0 h                           | 0.00       | 0.00 |                                                                 |
|           |          |                            | 1 h                           | 0.84       | 0.46 |                                                                 |
|           |          |                            | 2 h                           | 0.80       | 0.09 |                                                                 |
|           |          | <i>IKK2</i> -/-, nucleus   | 0 h                           | 0.00       | 0.00 |                                                                 |
|           |          |                            | 1 h                           | 0.01       | 0.01 | p = 0.12                                                        |
|           |          |                            | 2 h                           | 0.00       | 0.00 | **p = 0.0056                                                    |
|           |          |                            | §set to 1 for WT              |            |      | T-test, unpaired, two-tailed                                    |
|           |          |                            | #set to 1 for <i>IKK2</i> -/- |            |      |                                                                 |

| Figure 2a | Antibody | Sample          | X-link    | Mean (n=6 <sup>†</sup> ) | ±SD  | p-value ( <i>IKK2</i> -/- vs. corresponding WT)                                                                             |
|-----------|----------|-----------------|-----------|--------------------------|------|-----------------------------------------------------------------------------------------------------------------------------|
|           | P-JNK    | WT              | 0 min     | 0.03                     | 0.04 |                                                                                                                             |
|           |          |                 | 30 min    | 0.12                     | 0.13 |                                                                                                                             |
|           |          |                 | 60 min    | 0.42                     | 0.23 |                                                                                                                             |
|           |          |                 | 90 min    | 0.79                     | 0.28 |                                                                                                                             |
|           |          |                 | §120 min  | 1.00                     | 0.00 |                                                                                                                             |
|           |          |                 | 180 min   | 1.22                     | 0.51 |                                                                                                                             |
|           |          | <i>IKK2</i> -/- | 0 min     | 0.01                     | 0.01 |                                                                                                                             |
|           |          |                 | 30 min    | 0.01                     | 0.02 | p = 0.062                                                                                                                   |
|           |          |                 | 60 min    | 0.02                     | 0.03 | **p = 0.0018                                                                                                                |
|           |          |                 | 90 min    | 0.07                     | 0.10 | ***p = 0.00013                                                                                                              |
|           |          |                 | 120 min   | 0.09                     | 0.13 | ****p = 0.00000013                                                                                                          |
|           |          |                 | 180 min   | 0.05                     | 0.06 | ***p = 0.00024                                                                                                              |
|           |          |                 | §set to 1 |                          |      | T-test, unpaired, two-tailed                                                                                                |
|           |          |                 |           |                          |      | <sup>†</sup> stimulation times were included into the quantitative analysis, which were tested in all biological replicates |

| Figure 2b | Antibody | Sample | X-link    | Mean (n=3) | ±SD  | p-value (ACHP vs. corresponding DMSO) |
|-----------|----------|--------|-----------|------------|------|---------------------------------------|
|           | P-JNK    | DMSO   | 0 min     | 0.01       | 0.01 |                                       |
|           |          |        | 30 min    | 0.02       | 0.01 |                                       |
|           |          |        | 60 min    | 0.19       | 0.17 |                                       |
|           |          |        | 90 min    | 0.71       | 0.38 |                                       |
|           |          |        | §120 min  | 1.00       | 0.00 |                                       |
|           |          |        | 180 min   | 0.87       | 0.14 |                                       |
|           |          | ACHP   | 0 min     | 0.00       | 0.00 |                                       |
|           |          |        | 30 min    | 0.00       | 0.00 |                                       |
|           |          |        | 60 min    | 0.01       | 0.01 | p = 0.14                              |
|           |          |        | 90 min    | 0.04       | 0.02 | *p = 0.039                            |
|           |          |        | 120 min   | 0.09       | 0.06 | ****p = 0.000013                      |
|           |          |        | 180 min   | 0.12       | 0.13 | **p = 0.0025                          |
|           |          |        | §set to 1 |            |      | T-test, unpaired, two-tailed          |

| Figure 2c | Antibody | Sample          | TNF $\alpha$          | Mean (n=3 <sup>†</sup> ) | $\pm$ SD | p-value ( <i>IKK2</i> -/- vs. corresponding WT)                                                                             |
|-----------|----------|-----------------|-----------------------|--------------------------|----------|-----------------------------------------------------------------------------------------------------------------------------|
|           | P-JNK    | <i>IKK2</i> -/- | 0 min                 | 0.03                     | 0.04     |                                                                                                                             |
|           |          |                 | 10 min                | 0.46                     | 0.15     | **p = 0.0029                                                                                                                |
|           |          |                 | 20 min                | 0.64                     | 0.19     | p = 0.41                                                                                                                    |
|           |          |                 | 30 min                | 0.13                     | 0.09     | p = 0.73                                                                                                                    |
|           |          | WT              | 0 min                 | 0.05                     | 0.07     |                                                                                                                             |
|           |          |                 | <sup>§</sup> 10 min   | 1.00                     | 0.00     |                                                                                                                             |
|           |          |                 | 20 min                | 0.49                     | 0.20     |                                                                                                                             |
|           |          |                 | 30 min                | 0.10                     | 0.11     |                                                                                                                             |
|           |          |                 | <sup>§</sup> set to 1 |                          |          |                                                                                                                             |
|           |          |                 |                       |                          |          | T-test, unpaired, two-tailed                                                                                                |
|           |          |                 |                       |                          |          | <sup>†</sup> stimulation times were included into the quantitative analysis, which were tested in all biological replicates |

|  | Antibody              | Sample          | TNF $\alpha$          | Mean (n=3*) | $\pm$ SD | p-value ( <i>IKK2</i> -/- vs. corresponding WT)                                                                             |
|--|-----------------------|-----------------|-----------------------|-------------|----------|-----------------------------------------------------------------------------------------------------------------------------|
|  | I $\kappa$ B $\alpha$ | <i>IKK2</i> -/- | <sup>§</sup> 0 min    | 1.00        | 0.00     |                                                                                                                             |
|  |                       |                 | 10 min                | 0.88        | 0.10     | ***p = 0.00021                                                                                                              |
|  |                       |                 | 20 min                | 0.79        | 0.17     | **p = 0.0013                                                                                                                |
|  |                       |                 | 30 min                | 0.71        | 0.10     | ***p = 0.00091                                                                                                              |
|  |                       | WT              | <sup>§</sup> 0 min    | 1.00        | 0.00     |                                                                                                                             |
|  |                       |                 | 10 min                | 0.04        | 0.06     |                                                                                                                             |
|  |                       |                 | 20 min                | 0.01        | 0.02     |                                                                                                                             |
|  |                       |                 | 30 min                | 0.11        | 0.06     |                                                                                                                             |
|  |                       |                 | <sup>§</sup> set to 1 |             |          |                                                                                                                             |
|  |                       |                 |                       |             |          | T-test, unpaired, two-tailed                                                                                                |
|  |                       |                 |                       |             |          | <sup>†</sup> stimulation times were included into the quantitative analysis, which were tested in all biological replicates |

| Figure 2d | Antibody | Sample          | IL-1                  | Mean (n=3) | $\pm$ SD | p-value ( <i>IKK2</i> -/- vs. corresponding WT) |
|-----------|----------|-----------------|-----------------------|------------|----------|-------------------------------------------------|
|           | P-JNK    | <i>IKK2</i> -/- | 0 min                 | 0.00       | 0.00     |                                                 |
|           |          |                 | 5 min                 | 0.28       | 0.22     | p = 0.63                                        |
|           |          |                 | 10 min                | 0.86       | 0.25     | p = 0.52                                        |
|           |          |                 | 15 min                | 1.10       | 0.29     | p = 0.71                                        |
|           |          |                 | 20 min                | 0.74       | 0.55     | p = 0.46                                        |
|           |          |                 | 30 min                | 0.39       | 0.19     | p = 0.81                                        |
|           |          |                 | 45 min                | 0.10       | 0.05     | p = 0.74                                        |
|           |          |                 | 60 min                | 0.11       | 0.10     | p = 0.76                                        |
|           |          | WT              | 0 min                 | 0.00       | 0.00     |                                                 |
|           |          |                 | 5 min                 | 0.45       | 0.50     |                                                 |
|           |          |                 | 10 min                | 0.99       | 0.19     |                                                 |
|           |          |                 | 15 min                | 0.99       | 0.40     |                                                 |
|           |          |                 | <sup>§</sup> 20 min   | 1.00       | 0.00     |                                                 |
|           |          |                 | 30 min                | 0.45       | 0.37     |                                                 |
|           |          |                 | 45 min                | 0.12       | 0.11     |                                                 |
|           |          |                 | 60 min                | 0.14       | 0.13     |                                                 |
|           |          |                 | <sup>§</sup> set to 1 |            |          |                                                 |
|           |          |                 |                       |            |          | T-test, unpaired, two-tailed                    |

|  | Antibody              | Sample          | IL-1                  | Mean (n=3) | $\pm$ SD | p-value ( <i>IKK2</i> -/- vs. corresponding WT) |
|--|-----------------------|-----------------|-----------------------|------------|----------|-------------------------------------------------|
|  | I $\kappa$ B $\alpha$ | <i>IKK2</i> -/- | <sup>§</sup> 0 min    | 1.00       | 0.00     |                                                 |
|  |                       |                 | 5 min                 | 0.62       | 0.11     | p = 0.084                                       |
|  |                       |                 | 10 min                | 0.42       | 0.05     | ***p = 0.00014                                  |
|  |                       |                 | 15 min                | 0.24       | 0.08     | **p = 0.0071                                    |
|  |                       |                 | 20 min                | 0.15       | 0.09     | p = 0.054                                       |
|  |                       |                 | 30 min                | 0.14       | 0.08     | p = 0.21                                        |
|  |                       |                 | 45 min                | 0.68       | 0.35     | p = 0.61                                        |
|  |                       |                 | 60 min                | 0.89       | 0.23     | p = 0.46                                        |
|  |                       | WT              | <sup>§</sup> 0 min    | 1.00       | 0.00     |                                                 |
|  |                       |                 | 5 min                 | 0.35       | 0.18     |                                                 |
|  |                       |                 | 10 min                | 0.00       | 0.01     |                                                 |
|  |                       |                 | 15 min                | 0.00       | 0.01     |                                                 |
|  |                       |                 | 20 min                | 0.01       | 0.01     |                                                 |
|  |                       |                 | 30 min                | 0.06       | 0.06     |                                                 |
|  |                       |                 | 45 min                | 0.55       | 0.24     |                                                 |
|  |                       |                 | 60 min                | 1.08       | 0.32     |                                                 |
|  |                       |                 | <sup>§</sup> set to 1 |            |          |                                                 |
|  |                       |                 |                       |            |          | T-test, unpaired, two-tailed                    |

**Figure 2e**

| Antibody | Sample                                        | X-link   | Mean (n=2) | ±SD  | p-value (vs. corresponding WT) |
|----------|-----------------------------------------------|----------|------------|------|--------------------------------|
| P-JNK    | WT                                            | 0 min    | 0.04       | 0.01 |                                |
|          |                                               | 30 min   | 0.11       | 0.13 |                                |
|          |                                               | 60 min   | 0.55       | 0.28 |                                |
|          |                                               | 90 min   | 0.87       | 0.12 |                                |
|          |                                               | 120 min  | 0.97       | 0.15 |                                |
|          |                                               | §180 min | 1.00       | 0.00 |                                |
|          | <i>IKK1<sup>crKO</sup></i>                    | 0 min    | 0.00       | 0.00 |                                |
|          |                                               | 30 min   | 0.03       | 0.04 | p = 0.47                       |
|          |                                               | 60 min   | 0.42       | 0.16 | p = 0.61                       |
|          |                                               | 90 min   | 0.75       | 0.14 | p = 0.45                       |
|          |                                               | 120 min  | 0.44       | 0.14 | p = 0.068                      |
|          |                                               | 180 min  | 0.46       | 0.17 | *p = 0.043                     |
|          | <i>IKK2<sup>-/-</sup></i>                     | 0 min    | 0.00       | 0.00 |                                |
|          |                                               | 30 min   | 0.00       | 0.00 | p = 0.35                       |
|          |                                               | 60 min   | 0.00       | 0.00 | p = 0.11                       |
|          |                                               | 90 min   | 0.17       | 0.15 | *p = 0.035                     |
|          |                                               | 120 min  | 0.19       | 0.16 | *p = 0.037                     |
|          |                                               | 180 min  | 0.09       | 0.06 | **p = 0.0019                   |
|          | <i>IKK1<sup>crKO</sup>/IKK2<sup>-/-</sup></i> | 0 min    | 0.00       | 0.00 |                                |
|          |                                               | 30 min   | 0.00       | 0.00 | p = 0.35                       |
|          |                                               | 60 min   | 0.01       | 0.01 | p = 0.11                       |
|          |                                               | 90 min   | 0.19       | 0.16 | *p = 0.041                     |
|          |                                               | 120 min  | 0.00       | 0.00 | *p = 0.012                     |
|          |                                               | 180 min  | 0.03       | 0.04 | ***p = 0.00094                 |

§set to 1

T-test, unpaired, two-tailed

| Antibody | Sample                                        | X-link  | Mean (n=2) | ±SD  | p-value (vs. corresponding WT) |
|----------|-----------------------------------------------|---------|------------|------|--------------------------------|
| IκBα     | WT                                            | §0 min  | 1.00       | 0.00 |                                |
|          |                                               | 30 min  | 0.89       | 0.27 |                                |
|          |                                               | 60 min  | 0.27       | 0.11 |                                |
|          |                                               | 90 min  | 0.13       | 0.16 |                                |
|          |                                               | 120 min | 0.24       | 0.17 |                                |
|          |                                               | 180 min | 0.32       | 0.00 |                                |
|          | <i>IKK1<sup>crKO</sup></i>                    | §0 min  | 1.00       | 0.00 |                                |
|          |                                               | 30 min  | 0.15       | 0.16 | p = 0.08                       |
|          |                                               | 60 min  | 0.07       | 0.10 | p = 0.19                       |
|          |                                               | 90 min  | 0.14       | 0.05 | p = 0.94                       |
|          |                                               | 120 min | 0.21       | 0.08 | p = 0.81                       |
|          |                                               | 180 min | 0.26       | 0.15 | p = 0.68                       |
|          | <i>IKK2<sup>-/-</sup></i>                     | §0 min  | 1.00       | 0.00 |                                |
|          |                                               | 30 min  | 0.84       | 0.01 | p = 0.81                       |
|          |                                               | 60 min  | 0.89       | 0.06 | *p = 0.019                     |
|          |                                               | 90 min  | 0.80       | 0.10 | *p = 0.036                     |
|          |                                               | 120 min | 0.81       | 0.01 | *p = 0.043                     |
|          |                                               | 180 min | 0.88       | 0.09 | *p = 0.011                     |
|          | <i>IKK1<sup>crKO</sup>/IKK2<sup>-/-</sup></i> | §0 min  | 1.00       | 0.00 |                                |
|          |                                               | 30 min  | 1.95       | 0.34 | p = 0.073                      |
|          |                                               | 60 min  | 1.84       | 0.21 | *p = 0.01                      |
|          |                                               | 90 min  | 2.06       | 0.73 | p = 0.067                      |
|          |                                               | 120 min | 1.22       | 0.59 | p = 0.15                       |
|          |                                               | 180 min | 0.97       | 0.47 | p = 0.18                       |

§set to 1

T-test, unpaired, two-tailed



| Figure 2f | Antibody | Sample                      | X-link    | Mean (n=2 WT,                           | ±SD  | p-value ( <i>NEMO</i> <sup>crKO</sup> vs. corresponding WT) |
|-----------|----------|-----------------------------|-----------|-----------------------------------------|------|-------------------------------------------------------------|
|           |          |                             |           | n=5 <i>NEMO</i> <sup>crKO</sup> clones) |      |                                                             |
|           | P-JNK    | WT                          | 0 min     | 0.01                                    | 0.01 |                                                             |
|           |          |                             | 30 min    | 0.15                                    | 0.22 |                                                             |
|           |          |                             | 60 min    | 0.48                                    | 0.35 |                                                             |
|           |          |                             | 90 min    | 0.84                                    | 0.40 |                                                             |
|           |          |                             | §120 min  | 1.00                                    | 0.00 |                                                             |
|           |          |                             | 180 min   | 0.61                                    | 0.21 |                                                             |
|           |          | <i>NEMO</i> <sup>crKO</sup> | 0 min     | 0.00                                    | 0.00 |                                                             |
|           |          |                             | 30 min    | 0.00                                    | 0.00 | p = 0.12                                                    |
|           |          |                             | 60 min    | 0.00                                    | 0.00 | *p = 0.015                                                  |
|           |          |                             | 90 min    | 0.00                                    | 0.00 | **p = 0.0024                                                |
|           |          |                             | 120 min   | 0.04                                    | 0.08 | ***p = 0.000015                                             |
|           |          |                             | 180 min   | 0.08                                    | 0.16 | *p = 0.013                                                  |
|           |          |                             | §set to 1 |                                         |      | T-test, unpaired, two-tailed                                |

| Antibody | Sample                      | X-link  | n=5 <i>NEMO</i> <sup>crKO</sup> clones) | Mean (n=2 WT, | ±SD       | p-value ( <i>NEMO</i> <sup>crKO</sup> vs. corresponding WT) |
|----------|-----------------------------|---------|-----------------------------------------|---------------|-----------|-------------------------------------------------------------|
|          |                             |         |                                         |               |           |                                                             |
| IκBα     | WT                          | §0 min  | 1.00                                    | 0.00          |           |                                                             |
|          |                             | 30 min  | 0.65                                    | 0.33          |           |                                                             |
|          |                             | 60 min  | 0.32                                    | 0.41          |           |                                                             |
|          |                             | 90 min  | 0.14                                    | 0.03          |           |                                                             |
|          |                             | 120 min | 0.44                                    | 0.37          |           |                                                             |
|          |                             | 180 min | 0.10                                    | 0.11          |           |                                                             |
|          | <i>NEMO</i> <sup>crKO</sup> | §0 min  | 1.00                                    | 0.00          |           |                                                             |
|          |                             | 30 min  | 0.76                                    | 0.16          | p = 0.56  |                                                             |
|          |                             | 60 min  | 0.70                                    | 0.43          | p = 0.34  |                                                             |
|          |                             | 90 min  | 0.54                                    | 0.18          | *p = 0.03 |                                                             |
|          |                             | 120 min | 0.54                                    | 0.22          | p = 0.66  |                                                             |
|          |                             | 180 min | 0.81                                    | 0.57          | p = 0.16  |                                                             |
|          |                             |         | §set to 1                               |               |           | T-test, unpaired, two-tailed                                |

| Figure 3a | Antibody | Sample  | X-link   | Mean (n=3) | ±SD  | p-value (TAK1-IH vs. corresponding DMSO) |
|-----------|----------|---------|----------|------------|------|------------------------------------------|
|           |          |         |          |            |      |                                          |
|           | P-JNK    | DMSO    | 0 min    | 0.00       | 0.00 |                                          |
|           |          |         | 30 min   | 0.08       | 0.13 |                                          |
|           |          |         | 60 min   | 0.43       | 0.68 |                                          |
|           |          |         | 90 min   | 0.86       | 0.61 |                                          |
|           |          |         | §120 min | 1.00       | 0.00 |                                          |
|           |          |         | 180 min  | 0.00       | 0.00 |                                          |
|           |          | TAK1-IH | 0 min    | 0.00       | 0.00 |                                          |
|           |          |         | 30 min   | 0.03       | 0.04 | p = 0.56                                 |
|           |          |         | 60 min   | 0.00       | 0.00 | p = 0.33                                 |
|           |          |         | 90 min   | 0.00       | 0.01 | p = 0.073                                |
|           |          |         | 120 min  | 0.04       | 0.06 | ***p = 0.000011                          |
|           |          |         |          | §set to 1  |      |                                          |

| Antibody | Sample  | X-link  | Mean (n=3) | ±SD  | p-value (TAK1-IH vs. corresponding DMSO) |
|----------|---------|---------|------------|------|------------------------------------------|
|          |         |         |            |      |                                          |
| IκBα     | DMSO    | §0 min  | 1.00       | 0.00 |                                          |
|          |         | 30 min  | 0.61       | 0.20 |                                          |
|          |         | 60 min  | 0.36       | 0.27 |                                          |
|          |         | 90 min  | 0.21       | 0.08 |                                          |
|          |         | 120 min | 0.20       | 0.05 |                                          |
|          |         | 180 min | 0.00       | 0.00 |                                          |
|          | TAK1-IH | §0 min  | 1.00       | 0.00 |                                          |
|          |         | 30 min  | 0.64       | 0.16 | p = 0.85                                 |
|          |         | 60 min  | 0.26       | 0.11 | p = 0.59                                 |
|          |         | 90 min  | 0.16       | 0.11 | p = 0.55                                 |
|          |         | 120 min | 0.07       | 0.07 | p = 0.077                                |
|          |         |         | §set to 1  |      |                                          |

| Figure 3b | Antibody        | Sample                      | X-link                 | Mean (n=3) | ±SD                          | p-value (vs. LMP1 wt, WT)      |
|-----------|-----------------|-----------------------------|------------------------|------------|------------------------------|--------------------------------|
|           |                 |                             |                        |            |                              |                                |
|           | P-IKK2 S177/181 | WT + TAK1-IH                | vector                 | 0.00       | 0.00                         |                                |
|           |                 |                             | LMP1 wt                | 0.86       | 0.36                         | p = 0.57                       |
|           |                 |                             | AAA/Y <sub>384</sub> G | 0.15       | 0.24                         |                                |
|           |                 |                             | vector                 | 0.00       | 0.00                         |                                |
|           |                 |                             | §LMP1 wt               | 1.00       | 0.00                         |                                |
|           |                 |                             | AAA/Y <sub>384</sub> G | 0.09       | 0.08                         |                                |
|           |                 | WT                          | vector                 | 0.00       | 0.00                         |                                |
|           |                 |                             | LMP1 wt                | 0.00       | 0.00                         | no p-value determinable vs. WT |
|           |                 |                             | AAA/Y <sub>384</sub> G | 0.00       | 0.00                         |                                |
|           |                 |                             | vector                 | 0.00       | 0.00                         |                                |
|           |                 |                             | LMP1 wt                | 0.00       | 0.00                         |                                |
|           |                 |                             | AAA/Y <sub>384</sub> G | 0.00       | 0.00                         |                                |
|           |                 | <i>TAK1</i> <sup>crKO</sup> | vector                 | 0.00       | 0.00                         |                                |
|           |                 |                             | LMP1 wt                | 0.00       | 0.00                         |                                |
|           |                 |                             | AAA/Y <sub>384</sub> G | 0.00       | 0.00                         |                                |
|           |                 |                             | vector                 | 0.00       | 0.00                         |                                |
|           |                 |                             | LMP1 wt                | 0.00       | 0.00                         |                                |
|           |                 |                             | AAA/Y <sub>384</sub> G | 0.00       | 0.00                         |                                |
|           |                 | §set to 1                   |                        |            | T-test, unpaired, two-tailed |                                |

| Figure 3d | Antibody        | Sample  | Mean (n=4 DMSO, ACHP, n=3 TAK1-IH) | ±SD  | p-value (vs. LMP1 wt, DMSO)  |               |
|-----------|-----------------|---------|------------------------------------|------|------------------------------|---------------|
|           | P-IKK2 S177/181 | DMSO    | <sup>§</sup> LMP1 wt               | 1    | 0                            |               |
|           |                 |         | vector                             | 0.19 | 0.23                         |               |
|           |                 | ACHP    | LMP1 wt                            | 0.13 | 0.22                         | ***p = 0.0002 |
|           |                 |         | vector                             | 0.00 | 0.00                         |               |
|           |                 | TAK1-IH | LMP1 wt                            | 1.18 | 0.49                         | p = 0.50      |
|           |                 |         | vector                             | 0.28 | 0.37                         |               |
|           |                 |         | <sup>§</sup> set to 1              |      | T-test, unpaired, two-tailed |               |

| Figure 3e | Antibody  | Sample               | Mean (n=2)            | ±SD  | p-value (vs. LMP1 wt, WT)    |              |
|-----------|-----------|----------------------|-----------------------|------|------------------------------|--------------|
|           | Ubiquitin | WT + TAK1-IH         | w/o                   | 0.09 | 0.07                         |              |
|           |           |                      | LMP1 wt               | 0.74 | 0.11                         | p = 0.083    |
|           |           | WT                   | w/o                   | 0.19 | 0.27                         |              |
|           |           |                      | <sup>§</sup> LMP1 wt  | 1.00 | 0.00                         |              |
|           |           | TAK1 <sup>crKO</sup> | w/o                   | 0.03 | 0.04                         |              |
|           |           |                      | LMP1 wt               | 0.07 | 0.09                         | **p = 0.0049 |
|           |           |                      | <sup>§</sup> set to 1 |      | T-test, unpaired, two-tailed |              |

| Figure 3f | Antibody | Sample               | Mean (n=3)           | ±SD                   | p-value (vs. LMP1wt WT) |                              |
|-----------|----------|----------------------|----------------------|-----------------------|-------------------------|------------------------------|
|           | LMP1     | WT                   | <sup>§</sup> LMP1 wt | 1.00                  | 0.00                    |                              |
|           |          |                      | LMP1 AAA/Δ371        | 0.03                  | 0.04                    |                              |
|           |          | TAK1 <sup>crKO</sup> | LMP1wt               | 0.03                  | 0.04                    | **** p < 0.0001              |
|           |          |                      | LMP1 AAA/Δ371        | 0.00                  | 0.00                    |                              |
|           |          |                      |                      | <sup>§</sup> set to 1 |                         | T-test, unpaired, two-tailed |

| Figure 4a | Antibody    | Sample                      | Mean (n=4)            | ±SD  | p-value (vs. LMP1 WT)        |
|-----------|-------------|-----------------------------|-----------------------|------|------------------------------|
|           | P-TPL2 S400 | <sup>§</sup> LMP1 WT        | 1                     | 0    |                              |
|           |             | LMP1 AAA/Y <sub>384</sub> G | 0.48                  | 0.36 | *p = 0.029                   |
|           |             |                             | <sup>§</sup> set to 1 |      | T-test, unpaired, two-tailed |

| Figure 4b | Antibody    | X-link              | n=1                   |
|-----------|-------------|---------------------|-----------------------|
|           | P-TPL2 S400 | 0 min               | 0                     |
|           |             | <sup>§</sup> 30 min | 1                     |
|           |             | 60 min              | 0                     |
|           |             |                     | <sup>§</sup> set to 1 |

| Figure 4c | Antibody | Sample      | X-link 1ean (n=5, n=2 for 3 h) | ±SD                   | p-value (vs. 0 h) |                              |
|-----------|----------|-------------|--------------------------------|-----------------------|-------------------|------------------------------|
|           | TPL2     | NGFR-LMP1wt | <sup>§</sup> 0 h               | 1                     | 0                 |                              |
|           |          |             | 1 h                            | 0.36                  | 0.23              | **p = 0.0032                 |
|           |          |             | 2 h                            | 0.10                  | 0.07              | ****p < 0.00001              |
|           |          |             | 3 h                            | 0.06                  | 0.07              | *p = 0.032                   |
|           |          |             |                                | <sup>§</sup> set to 1 |                   | T-test, unpaired, two-tailed |

|                  |          |                     |                       |                          |              |                                                                                                                              |
|------------------|----------|---------------------|-----------------------|--------------------------|--------------|------------------------------------------------------------------------------------------------------------------------------|
| <b>Figure 4d</b> | Antibody | Sample              | X-Link                | Mean (n=2 <sup>†</sup> ) | ±SD          | p-value (60 min vs. 0 min)                                                                                                   |
|                  | TPL2     | TPL2 coIP           | <sup>§</sup> 0 min    | 1                        | 0            |                                                                                                                              |
|                  |          | TPL2 coIP           | 60 min                | 0.42                     | 0.26         | p = 0.086                                                                                                                    |
|                  |          |                     | <sup>§</sup> set to 1 |                          |              | T-test, unpaired, two-tailed                                                                                                 |
|                  |          |                     |                       |                          |              | <sup>†</sup> stimulation times were included into the quantitative analysis, which were tested in both biological replicates |
| <b>Figure 4e</b> | Antibody | Sample              | X-Link                | Mean (n=2)               | ±SD          | p-value (siIKK2 vs. corresponding siCTRL)                                                                                    |
|                  | TPL2     | siCTRL              | <sup>§</sup> 0 h      | 1.00                     | 0.00         |                                                                                                                              |
|                  |          |                     | 1 h                   | 0.31                     | 0.25         |                                                                                                                              |
|                  |          |                     | 2 h                   | 0.26                     | 0.24         |                                                                                                                              |
|                  |          | siIKK2              | <sup>§</sup> 0 h      | 1.00                     | 0.00         |                                                                                                                              |
|                  |          |                     | 1 h                   | 1.09                     | 0.11         | p = 0.055    **p = 0.0072                                                                                                    |
|                  |          |                     | 2 h                   | 0.93                     | 0.11         | p = 0.072    *p = 0.015                                                                                                      |
|                  |          |                     | <sup>§</sup> set to 1 |                          |              | T-test, unpaired, two-tailed    two-way ANOVA                                                                                |
| <b>Figure 4f</b> | Antibody | Sample              | X-Link                | Mean (n=2)               | ±SD          | p-value (ACHP vs. corresponding DMSO)                                                                                        |
|                  | TPL2     | DMSO                | <sup>§</sup> 0 h      | 1.00                     | 0.00         |                                                                                                                              |
|                  |          |                     | 1 h                   | 0.32                     | 0.34         |                                                                                                                              |
|                  |          |                     | 2 h                   | 0.10                     | 0.12         |                                                                                                                              |
|                  |          | ACHP                | <sup>§</sup> 0 h      | 1.00                     | 0.00         |                                                                                                                              |
|                  |          |                     | 1 h                   | 1.04                     | 0.20         | p = 0.12                                                                                                                     |
|                  |          |                     | 2 h                   | 0.88                     | 0.20         | *p = 0.041                                                                                                                   |
|                  |          |                     | <sup>§</sup> set to 1 |                          |              | T-test, unpaired, two-tailed                                                                                                 |
| <b>Figure 4g</b> | Antibody | Sample              | X-Link                | Mean (n=2)               | ±SD          | p-value (IKK2 <sup>-/-</sup> vs. corresponding WT)                                                                           |
|                  | TPL2     | WT                  | <sup>§</sup> 0 h      | 1.00                     | 0.00         |                                                                                                                              |
|                  |          |                     | 1 h                   | 0.50                     | 0.24         |                                                                                                                              |
|                  |          |                     | 2 h                   | 0.14                     | 0.15         |                                                                                                                              |
|                  |          |                     | 3 h                   | 0.08                     | 0.09         |                                                                                                                              |
|                  |          | IKK2 <sup>-/-</sup> | <sup>§</sup> 0 h      | 1.00                     | 0.00         |                                                                                                                              |
|                  |          |                     | 1 h                   | 1.01                     | 0.10         | p = 0.1                                                                                                                      |
|                  |          | 2 h                 | 0.93                  | 0.14                     | *p = 0.033   |                                                                                                                              |
|                  |          | 3 h                 | 1.33                  | 0.06                     | **p = 0.0037 |                                                                                                                              |
|                  |          |                     | <sup>§</sup> set to 1 |                          |              | T-test, unpaired, two-tailed                                                                                                 |

| Figure 5a | Antibody | Sample | X-Link                | Mean (n=3 <sup>†</sup> ) | ±SD  | p-value (siTPL2 vs. corresponding siCTRL)                                                                                   |
|-----------|----------|--------|-----------------------|--------------------------|------|-----------------------------------------------------------------------------------------------------------------------------|
|           | P-JNK    | siCTRL | 0 min                 | 0.00                     | 0.00 |                                                                                                                             |
|           |          |        | 30 min                | 0.00                     | 0.00 |                                                                                                                             |
|           |          |        | 60 min                | 0.04                     | 0.04 |                                                                                                                             |
|           |          |        | <sup>§</sup> 120 min  | 1.00                     | 0.00 |                                                                                                                             |
|           |          | siTPL2 | 0 min                 | 0.00                     | 0.00 |                                                                                                                             |
|           |          |        | 30 min                | 0.00                     | 0.00 |                                                                                                                             |
|           |          |        | 60 min                | 0.04                     | 0.05 | p = 0.91                                                                                                                    |
|           |          |        | 120 min               | 0.42                     | 0.12 | **p = 0.0011                                                                                                                |
|           |          |        | <sup>§</sup> set to 1 |                          |      | T-test, unpaired, two-tailed                                                                                                |
|           |          |        |                       |                          |      | <sup>†</sup> stimulation times were included into the quantitative analysis, which were tested in all biological replicates |

| Antibody | Sample | X-Link                | Mean (n=3 <sup>†</sup> ) | ±SD  | p-value (siCTRL vs. corresponding siTPL2)                                                                                   |
|----------|--------|-----------------------|--------------------------|------|-----------------------------------------------------------------------------------------------------------------------------|
| IκBα     | siCTRL | <sup>§</sup> 0 min    | 1.00                     | 0.00 |                                                                                                                             |
|          |        | 30 min                | 0.74                     | 0.34 |                                                                                                                             |
|          |        | 60 min                | 0.29                     | 0.23 |                                                                                                                             |
|          |        | 120 min               | 0.20                     | 0.12 |                                                                                                                             |
|          | siTPL2 | <sup>§</sup> 0 min    | 1.00                     | 0.00 |                                                                                                                             |
|          |        | 30 min                | 0.75                     | 0.20 | p = 0.96                                                                                                                    |
|          |        | 60 min                | 0.31                     | 0.24 | p = 0.92                                                                                                                    |
|          |        | 120 min               | 0.24                     | 0.20 | p = 0.77                                                                                                                    |
|          |        | <sup>§</sup> set to 1 |                          |      | T-test, unpaired, two-tailed                                                                                                |
|          |        |                       |                          |      | <sup>†</sup> stimulation times were included into the quantitative analysis, which were tested in all biological replicates |

| Figure 5b | Antibody | Sample  | X-Link                | Mean (n=4) | ±SD  | p-value (TPL2-IH vs. corresponding DMSO) |
|-----------|----------|---------|-----------------------|------------|------|------------------------------------------|
|           | P-JNK    | DMSO    | 0 min                 | 0.02       | 0.04 |                                          |
|           |          |         | 30 min                | 0.03       | 0.04 |                                          |
|           |          |         | 60 min                | 0.11       | 0.06 |                                          |
|           |          |         | 90 min                | 0.42       | 0.09 |                                          |
|           |          |         | <sup>§</sup> 120 min  | 1.00       | 0.00 |                                          |
|           |          |         | 180 min               | 1.14       | 0.12 |                                          |
|           |          | TPL2-IH | 0 min                 | 0.00       | 0.00 |                                          |
|           |          |         | 30 min                | 0.00       | 0.00 | p = 0.16                                 |
|           |          |         | 60 min                | 0.09       | 0.05 | p = 0.6                                  |
|           |          |         | 90 min                | 0.21       | 0.11 | *p = 0.025                               |
|           |          |         | 120 min               | 0.35       | 0.10 | ****p = 0.000012                         |
|           |          |         | 180 min               | 0.20       | 0.08 | ****p = 0.00001                          |
|           |          |         | <sup>§</sup> set to 1 |            |      | T-test, unpaired, two-tailed             |

| Antibody | Sample  | X-Link                | Mean (n=4) | ±SD  | p-value (TPL2-IH vs. corresponding DMSO) |
|----------|---------|-----------------------|------------|------|------------------------------------------|
| IκBα     | DMSO    | <sup>§</sup> 0 min    | 1.00       | 1.00 |                                          |
|          |         | 30 min                | 0.50       | 0.50 |                                          |
|          |         | 60 min                | 0.18       | 0.18 |                                          |
|          |         | 90 min                | 0.22       | 0.22 |                                          |
|          |         | 120 min               | 0.25       | 0.25 |                                          |
|          |         | 180 min               | 0.29       | 0.29 |                                          |
|          | TPL2-IH | <sup>§</sup> 0 min    | 1.00       | 0.00 |                                          |
|          |         | 30 min                | 0.64       | 0.21 | p = 0.23                                 |
|          |         | 60 min                | 0.43       | 0.23 | p = 0.07                                 |
|          |         | 90 min                | 0.28       | 0.22 | p = 0.59                                 |
|          |         | 120 min               | 0.36       | 0.31 | p = 0.55                                 |
|          |         | 180 min               | 0.29       | 0.19 | p = 0.99                                 |
|          |         | <sup>§</sup> set to 1 |            |      | T-test, unpaired, two-tailed             |

| Antibody           | Sample                      | X-Link  | Mean (n=2 <sup>†</sup> ) | ±SD  | p-value ( <i>TPL2</i> <sup>crKO</sup> vs. corresponding WT) |
|--------------------|-----------------------------|---------|--------------------------|------|-------------------------------------------------------------|
| Figure 5c<br>P-JNK | <i>TPL2</i> <sup>crKO</sup> | 0 min   | 0.00                     | 0.00 |                                                             |
|                    |                             | 30 min  | 0.01                     | 0.01 | *p = 0.020                                                  |
|                    |                             | 60 min  | 0.10                     | 0.14 | p = 0.15                                                    |
|                    |                             | 90 min  | 0.03                     | 0.01 | ****p = 0.000032                                            |
|                    | WT                          | 0 min   | 0.00                     | 0.01 |                                                             |
|                    |                             | 30 min  | 0.10                     | 0.02 |                                                             |
|                    |                             | 60 min  | 0.41                     | 0.14 |                                                             |
|                    |                             | §90 min | 1.00                     | 0.00 |                                                             |

§set to 1

T-test, unpaired, two-tailed

†stimulation times were included into the quantitative analysis, which were tested in both biological replicates

| Antibody | Sample                      | X-Link  | Mean (n=2 <sup>†</sup> ) | ±SD  | p-value ( <i>TPL2</i> <sup>crKO</sup> vs. corresponding WT) |
|----------|-----------------------------|---------|--------------------------|------|-------------------------------------------------------------|
| IkBα     | <i>TPL2</i> <sup>crKO</sup> | §0 min  | 1.00                     | 0.00 |                                                             |
|          |                             | 60 min  | 0.27                     | 0.06 | p = 0.064                                                   |
|          |                             | 120 min | 0.28                     | 0.10 | p = 0.66                                                    |
|          | WT                          | §0 min  | 1.00                     | 0.00 |                                                             |
|          |                             | 60 min  | 0.47                     | 0.05 |                                                             |
|          |                             | 120 min | 0.48                     | 0.56 |                                                             |

§set to 1

T-test, unpaired, two-tailed

†stimulation times were included into the quantitative analysis, which were tested in both biological replicates

| Antibody | Sample                                | X-Link   | Mean (n=3) | ±SD  | p-value ( <i>TPL2</i> <sup>crKO</sup> vs. WT) |
|----------|---------------------------------------|----------|------------|------|-----------------------------------------------|
| p65      | WT, nucleus                           | §LMP1 WT | 1.00       | 0.00 |                                               |
|          | <i>TPL2</i> <sup>crKO</sup> , nucleus | LMP1 WT  | 1.72       | 0.32 | p = 0.059                                     |
| p50      | WT, nucleus                           | §LMP1 WT | 1.00       | 0.00 |                                               |
|          | <i>TPL2</i> <sup>crKO</sup> , nucleus | LMP1 WT  | 0.77       | 0.25 | p = 0.18                                      |
| RelB     | WT, nucleus                           | §LMP1 WT | 1.00       | 0.00 |                                               |
|          | <i>TPL2</i> <sup>crKO</sup> , nucleus | LMP1 WT  | 1.18       | 1.19 | p = 0.80                                      |
| p52      | WT, nucleus                           | §LMP1 WT | 1.00       | 0.00 |                                               |
|          | <i>TPL2</i> <sup>crKO</sup> , nucleus | LMP1 WT  | 0.88       | 0.83 | p = 0.81                                      |

§set to 1

T-test, unpaired, two-tailed

**Figure 6a**

| Antibody | Sample | X-link              | Mean (n=2 <sup>†</sup> ) | ±SD  | p-value (ACHP vs. corresponding DMSO) |
|----------|--------|---------------------|--------------------------|------|---------------------------------------|
| P-JNK    | DMSO   | 0 min               | 0.06                     | 0.08 |                                       |
|          |        | <sup>§</sup> 30 min | 1.00                     | 0.00 |                                       |
|          |        | 60 min              | 0.27                     | 0.38 |                                       |
|          |        | 90 min              | 0.06                     | 0.09 |                                       |
|          |        | 120 min             | 0.18                     | 0.25 |                                       |
|          | ACHP   | 0 min               | 0.02                     | 0.03 |                                       |
|          |        | 30 min              | 0.19                     | 0.24 | *p = 0.041                            |
|          |        | 60 min              | 0.15                     | 0.22 | p = 0.75                              |
|          |        | 90 min              | 0.07                     | 0.11 | p = 0.92                              |
|          |        | 120 min             | 0.06                     | 0.08 | p = 0.59                              |

<sup>§</sup>set to 1

T-test, unpaired, two-tailed  
<sup>†</sup>stimulation times were included into the quantitative analysis, which were tested in all biological replicates

| Antibody | Sample | X-link             | Mean (n=2 <sup>†</sup> ) | ±SD  | p-value (ACHP vs. corresponding DMSO) |
|----------|--------|--------------------|--------------------------|------|---------------------------------------|
| IκBα     | DMSO   | <sup>§</sup> 0 min | 1.00                     | 0.00 |                                       |
|          |        | 30 min             | 0.41                     | 0.15 |                                       |
|          |        | 60 min             | 0.35                     | 0.00 |                                       |
|          |        | 90 min             | 0.57                     | 0.05 |                                       |
|          |        | 120 min            | 0.49                     | 0.28 |                                       |
|          | ACHP   | <sup>§</sup> 0 min | 1.00                     | 0.00 |                                       |
|          |        | 30 min             | 1.19                     | 0.40 | p = 0.12                              |
|          |        | 60 min             | 1.63                     | 0.67 | p = 0.11                              |
|          |        | 90 min             | 1.37                     | 0.01 | **p = 0.002                           |
|          |        | 120 min            | 1.71                     | 0.03 | *p = 0.026                            |

<sup>§</sup>set to 1

T-test, unpaired, two-tailed  
<sup>†</sup>stimulation times were included into the quantitative analysis, which were tested in all biological replicates

| Antibody | Sample | X-link              | Mean (n=3 <sup>†</sup> ) | ±SD  | p-value (DMSO vs. corresponding ACHP) |
|----------|--------|---------------------|--------------------------|------|---------------------------------------|
| P-ERK    | DMSO   | 0 min               | 0.11                     | 0.13 |                                       |
|          |        | <sup>§</sup> 30 min | 1.00                     | 0.00 |                                       |
|          |        | 60 min              | 0.56                     | 0.52 |                                       |
|          |        | 90 min              | 0.48                     | 0.67 |                                       |
|          |        | 120 min             | 0.61                     | 0.77 |                                       |
|          | ACHP   | 0 min               | 0.44                     | 0.54 |                                       |
|          |        | 30 min              | 0.38                     | 0.33 | *p = 0.032                            |
|          |        | 60 min              | 0.39                     | 0.40 | p = 0.67                              |
|          |        | 90 min              | 0.29                     | 0.43 | p = 0.71                              |
|          |        | 120 min             | 0.13                     | 0.18 | p = 0.35                              |

<sup>§</sup>set to 1

T-test, unpaired, two-tailed  
<sup>†</sup>stimulation times were included into the quantitative analysis, which were tested in all biological replicates

**Figure 6b**

| Antibody | Sample | CD40L               | Mean (n=2) | ±SD  | p-value (ACHP vs. corresponding DMSO) |
|----------|--------|---------------------|------------|------|---------------------------------------|
| P-JNK    | DMSO   | 0 min               | 0.00       | 0.00 |                                       |
|          |        | 5 min               | 0.24       | 0.14 |                                       |
|          |        | <sup>§</sup> 15 min | 1.00       | 0.00 |                                       |
|          |        | 30 min              | 0.33       | 0.47 |                                       |
|          |        | 45 min              | 0.02       | 0.02 |                                       |
|          | ACHP   | 0 min               | 0.00       | 0.00 |                                       |
|          |        | 5 min               | 0.29       | 0.22 | p = 0.8                               |
|          |        | 15 min              | 0.99       | 0.54 | p = 0.98                              |
|          |        | 30 min              | 0.35       | 0.49 | p = 0.98                              |
|          |        | 45 min              | 0.20       | 0.29 | p = 0.46                              |

<sup>§</sup>set to 1 T-test, unpaired, two-tailed

| Antibody | Sample | CD40L              | Mean (n=2) | ±SD  | p-value (ACHP vs. corresponding DMSO) |
|----------|--------|--------------------|------------|------|---------------------------------------|
| IκBα     | DMSO   | <sup>§</sup> 0 min | 1.00       | 0.00 |                                       |
|          |        | 5 min              | 0.55       | 0.26 |                                       |
|          |        | 15 min             | 0.22       | 0.23 |                                       |
|          |        | 30 min             | 0.03       | 0.02 |                                       |
|          |        | 45 min             | 0.60       | 0.11 |                                       |
|          | ACHP   | <sup>§</sup> 0 min | 1.00       | 0.00 |                                       |
|          |        | 5 min              | 0.85       | 0.03 | p = 0.24                              |
|          |        | 15 min             | 0.82       | 0.19 | p = 0.10                              |
|          |        | 30 min             | 0.86       | 0.06 | **p = 0.0025                          |
|          |        | 45 min             | 0.89       | 0.01 | p = 0.067                             |

<sup>§</sup>set to 1 T-test, unpaired, two-tailed

| Antibody | Sample | CD40L               | Mean (n=2) | ±SD  | p-value (ACHP vs. DMSO) |
|----------|--------|---------------------|------------|------|-------------------------|
| P-ERK    | DMSO   | 0 min               | 0.02       | 0.02 |                         |
|          |        | 5 min               | 0.14       | 0.20 |                         |
|          |        | <sup>§</sup> 15 min | 1.00       | 0.00 |                         |
|          |        | 30 min              | 2.68       | 3.44 |                         |
|          |        | 45 min              | 0.06       | 0.08 |                         |
|          | ACHP   | 0 min               | 0.07       | 0.09 |                         |
|          |        | 5 min               | 0.07       | 0.10 | p = 0.69                |
|          |        | 15 min              | 0.18       | 0.25 | *p = 0.044              |
|          |        | 30 min              | 0.08       | 0.11 | p = 0.40                |
|          |        | 45 min              | 0.16       | 0.22 | p = 0.61                |

<sup>§</sup>set to 1 T-test, unpaired, two-tailed

**Figure 6c**

| Antibody | Sample  | X-link              | Mean (n=3) | ±SD  | p-value (TPL2-IH vs. corresponding DMSO) |
|----------|---------|---------------------|------------|------|------------------------------------------|
| P-JNK    | DMSO    | 0 min               | 0.29       | 0.35 |                                          |
|          |         | <sup>§</sup> 30 min | 1.00       | 0.00 |                                          |
|          |         | 60 min              | 1.06       | 0.93 |                                          |
|          |         | 90 min              | 0.37       | 0.30 |                                          |
|          |         | 120 min             | 0.19       | 0.21 |                                          |
|          | TPL2-IH | 0 min               | 0.10       | 0.09 |                                          |
|          |         | 30 min              | 0.23       | 0.18 | **p = 0.0016                             |
|          |         | 60 min              | 0.24       | 0.31 | p = 0.22                                 |
|          |         | 90 min              | 0.08       | 0.09 | p = 0.18                                 |
|          |         | 120 min             | 0.03       | 0.04 | p = 0.25                                 |

<sup>§</sup>set to 1

T-test, unpaired, two-tailed

| Antibody | Sample  | X-link             | Mean (n=3) | ±SD  | p-value (TPL2-IH vs. corresponding DMSO) |
|----------|---------|--------------------|------------|------|------------------------------------------|
| IκBα     | DMSO    | <sup>§</sup> 0 min | 1.00       | 0.00 |                                          |
|          |         | 30 min             | 0.76       | 0.38 |                                          |
|          |         | 60 min             | 0.34       | 0.15 |                                          |
|          |         | 90 min             | 0.32       | 0.07 |                                          |
|          |         | 120 min            | 0.67       | 0.09 |                                          |
|          | TPL2-IH | <sup>§</sup> 0 min | 1.00       | 0.00 |                                          |
|          |         | 30 min             | 0.83       | 0.30 | p = 0.82                                 |
|          |         | 60 min             | 0.32       | 0.10 | p = 0.84                                 |
|          |         | 90 min             | 0.31       | 0.14 | p = 0.88                                 |
|          |         | 120 min            | 0.57       | 0.35 | p = 0.63                                 |

<sup>§</sup>set to 1

T-test, unpaired, two-tailed

| Antibody | Sample  | X-link              | Mean (n=3) | ±SD  | p-value (TPL2-IH vs. corresponding DMSO) |
|----------|---------|---------------------|------------|------|------------------------------------------|
| P-ERK    | DMSO    | 0 min               | 0.44       | 0.68 |                                          |
|          |         | <sup>§</sup> 30 min | 1.00       | 0.00 |                                          |
|          |         | 60 min              | 1.12       | 1.67 |                                          |
|          |         | 90 min              | 0.31       | 0.45 |                                          |
|          |         | 120 min             | 0.16       | 0.19 |                                          |
|          | TPL2-IH | 0 min               | 0.18       | 0.30 | p = 0.58                                 |
|          |         | 30 min              | 0.28       | 0.26 | **p = 0.0085                             |
|          |         | 60 min              | 0.85       | 1.26 | p = 0.83                                 |
|          |         | 90 min              | 0.19       | 0.27 | p = 0.73                                 |
|          |         | 120 min             | 0.20       | 0.29 | p = 0.87                                 |

<sup>§</sup>set to 1

T-test, unpaired, two-tailed



**Figure 6d**

| Antibody | Sample  | CD40L               | Mean (n=2 <sup>†</sup> ) | ±SD  | p-value (TPL2-IH vs. corresponding DMSO) |
|----------|---------|---------------------|--------------------------|------|------------------------------------------|
| P-JNK    | DMSO    | 0 min               | 0.00                     | 0.00 |                                          |
|          |         | 5 min               | 0.41                     | 0.29 |                                          |
|          |         | <sup>§</sup> 15 min | 1.00                     | 0.00 |                                          |
|          |         | 30 min              | 0.84                     | 0.21 |                                          |
|          | TPL2-IH | 0 min               | 0.01                     | 0.01 |                                          |
|          |         | 5 min               | 0.34                     | 0.31 | p = 0.82                                 |
|          |         | 15 min              | 0.85                     | 0.18 | p = 0.36                                 |
|          |         | 30 min              | 0.59                     | 0.51 | p = 0.59                                 |

<sup>§</sup>set to 1

T-test, unpaired, two-tailed

<sup>†</sup>stimulation times were included into the quantitative analysis, which were tested in both biological replicates

| Antibody | Sample  | CD40L              | Mean (n=2 <sup>†</sup> ) | ±SD  | p-value (TPL2-IH vs. corresponding DMSO) |
|----------|---------|--------------------|--------------------------|------|------------------------------------------|
| IκBα     | DMSO    | <sup>§</sup> 0 min | 1.00                     | 0.00 |                                          |
|          |         | 5 min              | 0.38                     | 0.42 |                                          |
|          |         | 15 min             | 0.02                     | 0.03 |                                          |
|          |         | 30 min             | 0.12                     | 0.16 |                                          |
|          | TPL2-IH | <sup>§</sup> 0 min | 1.00                     | 0.00 |                                          |
|          |         | 5 min              | 0.45                     | 0.62 | p = 0.91                                 |
|          |         | 15 min             | 0.03                     | 0.05 | p = 0.82                                 |
|          |         | 30 min             | 0.00                     | 0.00 | p = 0.40                                 |

<sup>§</sup>set to 1

T-test, unpaired, two-tailed

<sup>†</sup>stimulation times were included into the quantitative analysis, which were tested in both biological replicates

| Antibody | Sample  | CD40L               | Mean (n=2 <sup>†</sup> ) | ±SD  | p-value (TPL2-IH vs. corresponding DMSO) |
|----------|---------|---------------------|--------------------------|------|------------------------------------------|
| P-ERK    | DMSO    | 0 min               | 0.00                     | 0.00 |                                          |
|          |         | 5 min               | 0.21                     | 0.30 |                                          |
|          |         | <sup>§</sup> 15 min | 1.00                     | 0.00 |                                          |
|          |         | 30 min              | 0.39                     | 0.51 |                                          |
|          | TPL2-IH | 0 min               | 0.00                     | 0.00 |                                          |
|          |         | 5 min               | 0.00                     | 0.00 | p = 0.42                                 |
|          |         | 15 min              | 0.14                     | 0.20 | *p = 0.026                               |
|          |         | 30 min              | 0.15                     | 0.21 | p = 0.60                                 |

<sup>§</sup>set to 1

T-test, unpaired, two-tailed

<sup>†</sup>stimulation times were included into the quantitative analysis, which were tested in both biological replicates

**Figure 6f**

| Antibody  | Sample    | X-link  | Mean (n=3 DMSO,<br>n=5 TPL2-IH) | ±SD                          | p-value (TPL2-IH vs. corresponding DMSO) |  |
|-----------|-----------|---------|---------------------------------|------------------------------|------------------------------------------|--|
| P-JNK     | DMSO      | 0 min   | 0.00                            | 0.01                         |                                          |  |
|           |           | 30 min  | 0.16                            | 0.15                         |                                          |  |
|           |           | §60 min | 1.00                            | 0.00                         |                                          |  |
|           |           | 90 min  | 0.40                            | 0.07                         |                                          |  |
|           | TPL2-IH   | 0 min   | 0.01                            | 0.01                         |                                          |  |
|           |           | 30 min  | 0.05                            | 0.02                         | p = 0.14                                 |  |
|           |           | 60 min  | 0.34                            | 0.18                         | ***p = 0.00076                           |  |
|           |           | 90 min  | 0.17                            | 0.12                         | *p = 0.024                               |  |
|           | §set to 1 |         |                                 | T-test, unpaired, two-tailed |                                          |  |
|           | IkBα      | DMSO    | §0 min                          | 1.00                         | 0.00                                     |  |
| 30 min    |           |         | 0.72                            | 0.10                         |                                          |  |
| 60 min    |           |         | 0.44                            | 0.08                         |                                          |  |
| 90 min    |           |         | 0.50                            | 0.13                         |                                          |  |
| TPL2-IH   |           | §0 min  | 1.00                            | 0.00                         |                                          |  |
|           |           | 30 min  | 0.72                            | 0.20                         | p = 0.99                                 |  |
|           |           | 60 min  | 0.43                            | 0.09                         | p = 0.87                                 |  |
|           |           | 90 min  | 0.29                            | 0.05                         | p = 0.17                                 |  |
| §set to 1 |           |         | T-test, unpaired, two-tailed    |                              |                                          |  |
| P-JNK     |           | DMSO    | 0 min                           | 0.01                         | 0.02                                     |  |
|           | 30 min    |         | 0.18                            | 0.12                         |                                          |  |
|           | §60 min   |         | 1.00                            | 0.00                         |                                          |  |
|           | 90 min    |         | 0.55                            | 0.32                         |                                          |  |
|           | ACHP      | 0 min   | 0.02                            | 0.03                         |                                          |  |
|           |           | 30 min  | 0.02                            | 0.03                         | p = 0.20                                 |  |
|           |           | 60 min  | 0.03                            | 0.05                         | **p = 0.0011                             |  |
|           |           | 90 min  | 0.02                            | 0.02                         | p = 0.14                                 |  |
|           | §set to 1 |         |                                 | T-test, unpaired, two-tailed |                                          |  |
|           | IkBα      | DMSO    | §0 min                          | 1.00                         | 0.00                                     |  |
| 30 min    |           |         | 0.44                            | 0.37                         |                                          |  |
| 60 min    |           |         | 0.40                            | 0.08                         |                                          |  |
| 90 min    |           |         | 0.44                            | 0.22                         |                                          |  |
| ACHP      |           | §0 min  | 1.00                            | 0.00                         |                                          |  |
|           |           | 30 min  | 0.93                            | 0.01                         | p = 0.088                                |  |
|           |           | 60 min  | 0.89                            | 0.11                         | **p = 0.004                              |  |
|           |           | 90 min  | 0.98                            | 0.28                         | p = 0.058                                |  |
| §set to 1 |           |         | T-test, unpaired, two-tailed    |                              |                                          |  |

Supplementary Table 4. Phosphoimager quantification and statistics of kinase activities (Figures 3b and 3c)

n, number of biological replicates

SD, standard deviation

| Figure 3b | Substrate phosphorylation         | Sample               | Mean (n=3)              | ±SD       | p-value |  |                              |
|-----------|-----------------------------------|----------------------|-------------------------|-----------|---------|--|------------------------------|
| Figure 3b | IKK2 kinase activity, GST-IκBα~P* | TAK1-IH              | vector                  | 0.14      | 0.06    |  |                              |
|           |                                   |                      | LMP1 wt                 | 2.59      | 0.89    |  |                              |
|           |                                   |                      | AAA/Y <sub>384</sub> G  | 0.79      | 0.13    |  |                              |
|           |                                   | WT                   | vector                  | 0.14      | 0.06    |  |                              |
|           |                                   |                      | LMP1 wt                 | 2.93      | 1.46    |  |                              |
|           |                                   |                      | §AAA/Y <sub>384</sub> G | 1.00      | 0.00    |  |                              |
|           |                                   | TAK1 <sup>crKO</sup> | vector                  | 0.07      | 0.03    |  |                              |
|           |                                   |                      | LMP1 wt                 | 0.06      | 0.04    |  |                              |
|           |                                   |                      | AAA/Y <sub>384</sub> G  | 0.07      | 0.03    |  |                              |
|           |                                   |                      |                         | §set to 1 |         |  | T-test, unpaired, two-tailed |

p = 0.75 (TAK1-IH vs. WT); \*\*p = 0.008 (TAK1-IH vs. TAK1<sup>crKO</sup>)  
\*p = 0.027 (TAK1<sup>crKO</sup> vs. WT)

| Figure 3c | Substrate phosphorylation          | Sample               | Mean (n=3)              | ±SD       | p-value |  |                              |
|-----------|------------------------------------|----------------------|-------------------------|-----------|---------|--|------------------------------|
| Figure 3c | JNK1 kinase activity, GST-c-Jun~P* | TAK1-IH              | vector                  | 0.49      | 0.13    |  |                              |
|           |                                    |                      | LMP1 wt                 | 0.78      | 0.73    |  |                              |
|           |                                    |                      | AAA/Y <sub>384</sub> G  | 0.47      | 0.15    |  |                              |
|           |                                    | WT                   | vector                  | 0.72      | 0.20    |  |                              |
|           |                                    |                      | LMP1 wt                 | 11.28     | 5.84    |  |                              |
|           |                                    |                      | §AAA/Y <sub>384</sub> G | 1.00      | 0.00    |  |                              |
|           |                                    | TAK1 <sup>crKO</sup> | vector                  | 0.81      | 0.50    |  |                              |
|           |                                    |                      | LMP1 wt                 | 1.10      | 0.84    |  |                              |
|           |                                    |                      | AAA/Y <sub>384</sub> G  | 1.23      | 0.71    |  |                              |
|           |                                    |                      |                         | §set to 1 |         |  | T-test, unpaired, two-tailed |

\*p = 0.037 (TAK1-IH vs. WT); p = 0.64 (TAK1-IH vs. TAK1<sup>crKO</sup>)  
\*p = 0.041 (TAK1<sup>crKO</sup> vs. WT)

### Supplementary References

1. Sandvej, K. *et al.* Sequence analysis of the Epstein-Barr virus (EBV) latent membrane protein-1 gene and promoter region: identification of four variants among wild-type EBV isolates. *Blood* **90**, 323-330 (1997).
2. Mainou, B. A. & Raab-Traub, N. LMP1 strain variants: biological and molecular properties. *J Virol* **80**, 6458-6468 (2006).
3. Guiretti, D. M. *et al.* Structural variability of the carboxy-terminus of Epstein-Barr virus encoded latent membrane protein 1 gene in Hodgkin's lymphomas. *J Med Virol* **79**, 1730-1722 (2007).
